# Supplementary material for: Individual Differences in CD4/CD8 T-Cell Ratio Trajectories and Associated Risk Profiles Modeled From Acute HIV Infection
Source: PubMed Central journal article supplement — Psychosom Med. 2022 Jul 6;84(8):976–83. doi: 10.1097/PSY.0000000000001129 (PMC9553252; doi:10.1097/psy.0000000000001129), 2022-07-06
Supplement: psymed-84-976-s002.pdf [file psymed-84-976-s002.pdf]

**Supplemental Digital Content 2.** Partial dependency plots depicting the directionality of associations between risk features and classification in the trajectory group with slow CD4+ T-cell recovery vs. high CD8+ T-cell count.

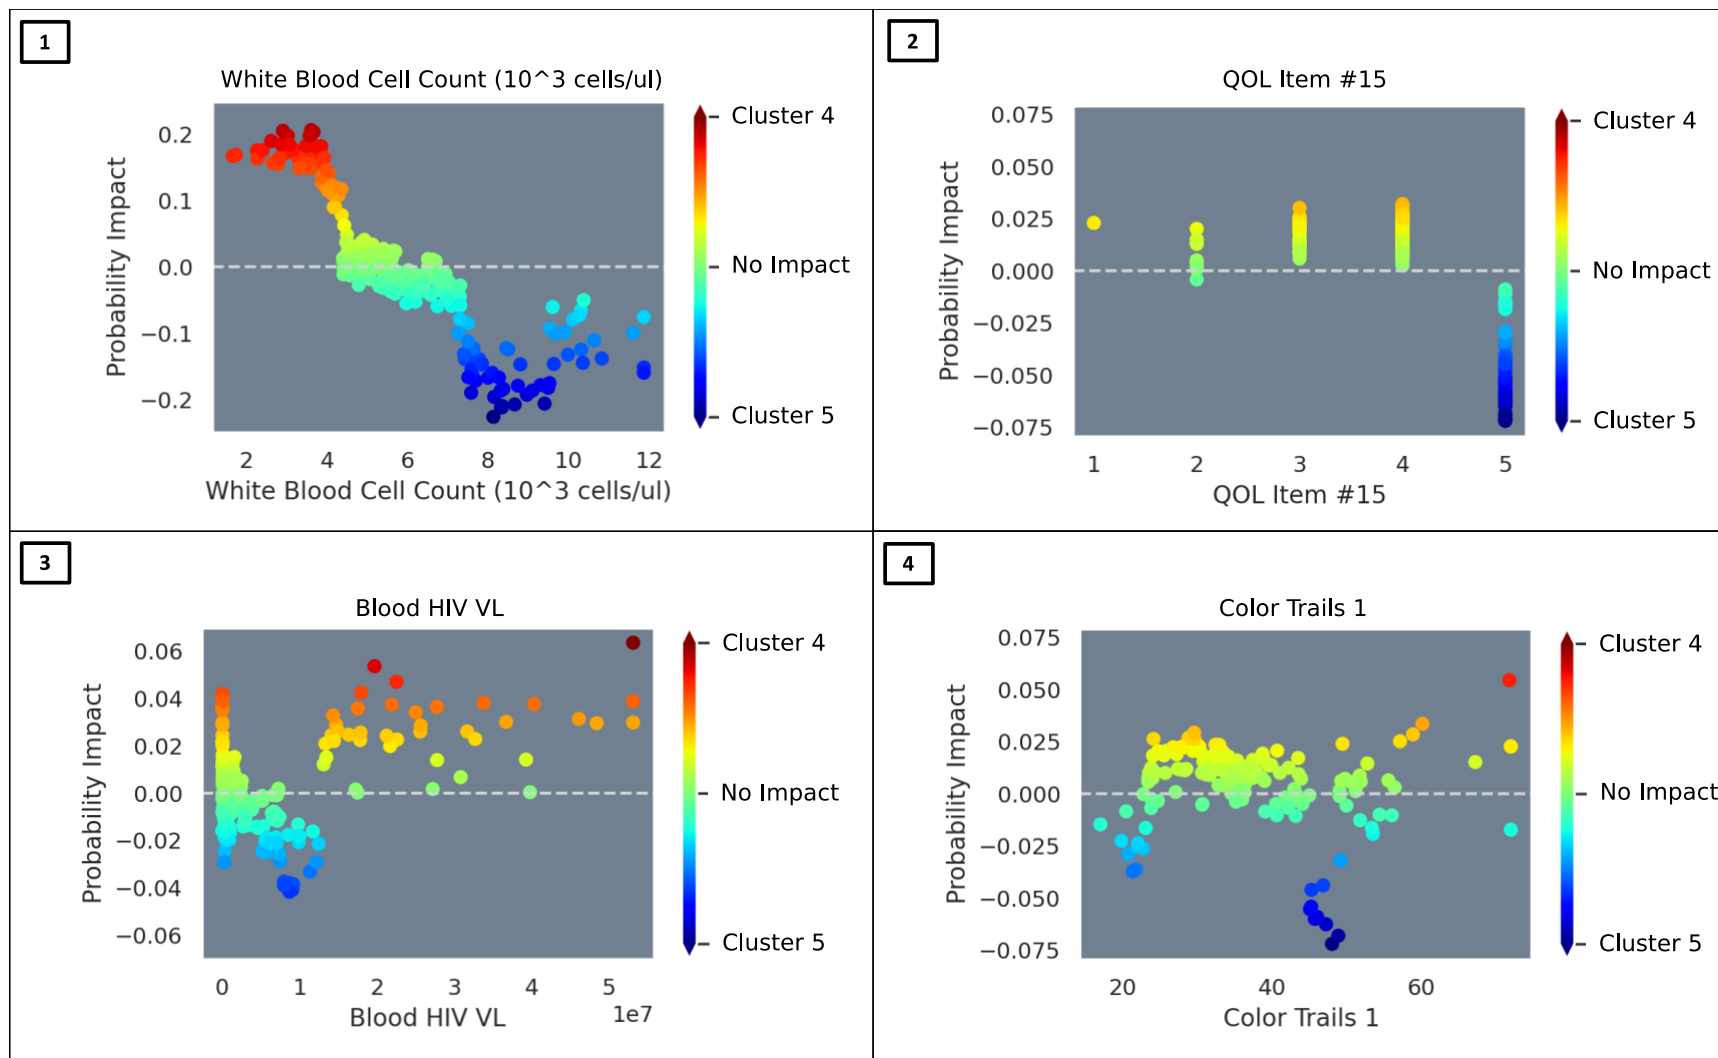

**SDC 2.** Partial dependency plots depicting linear and nonlinear associations between predictors of CD4/CD8 T-cell ratio inversion due to slow CD4+ T-cell recovery (group 4) vs. high CD8+ T-cell count (group 5). Red color represents classification in the slow CD4+ T-cell recovery group. Blue color represents classification in the high CD8+ T-cell group. Lower WBC, higher VL, worse Color Trails 1 performance, and lower ratings of QOL predicted slow CD4+ T-cell recovery.

**Supplemental Digital Content 2 (continued).** Partial dependency plots depicting the directionality of associations between risk features and classification in the trajectory group with slow CD4+ T-cell recovery vs. high CD8+ T-cell count.

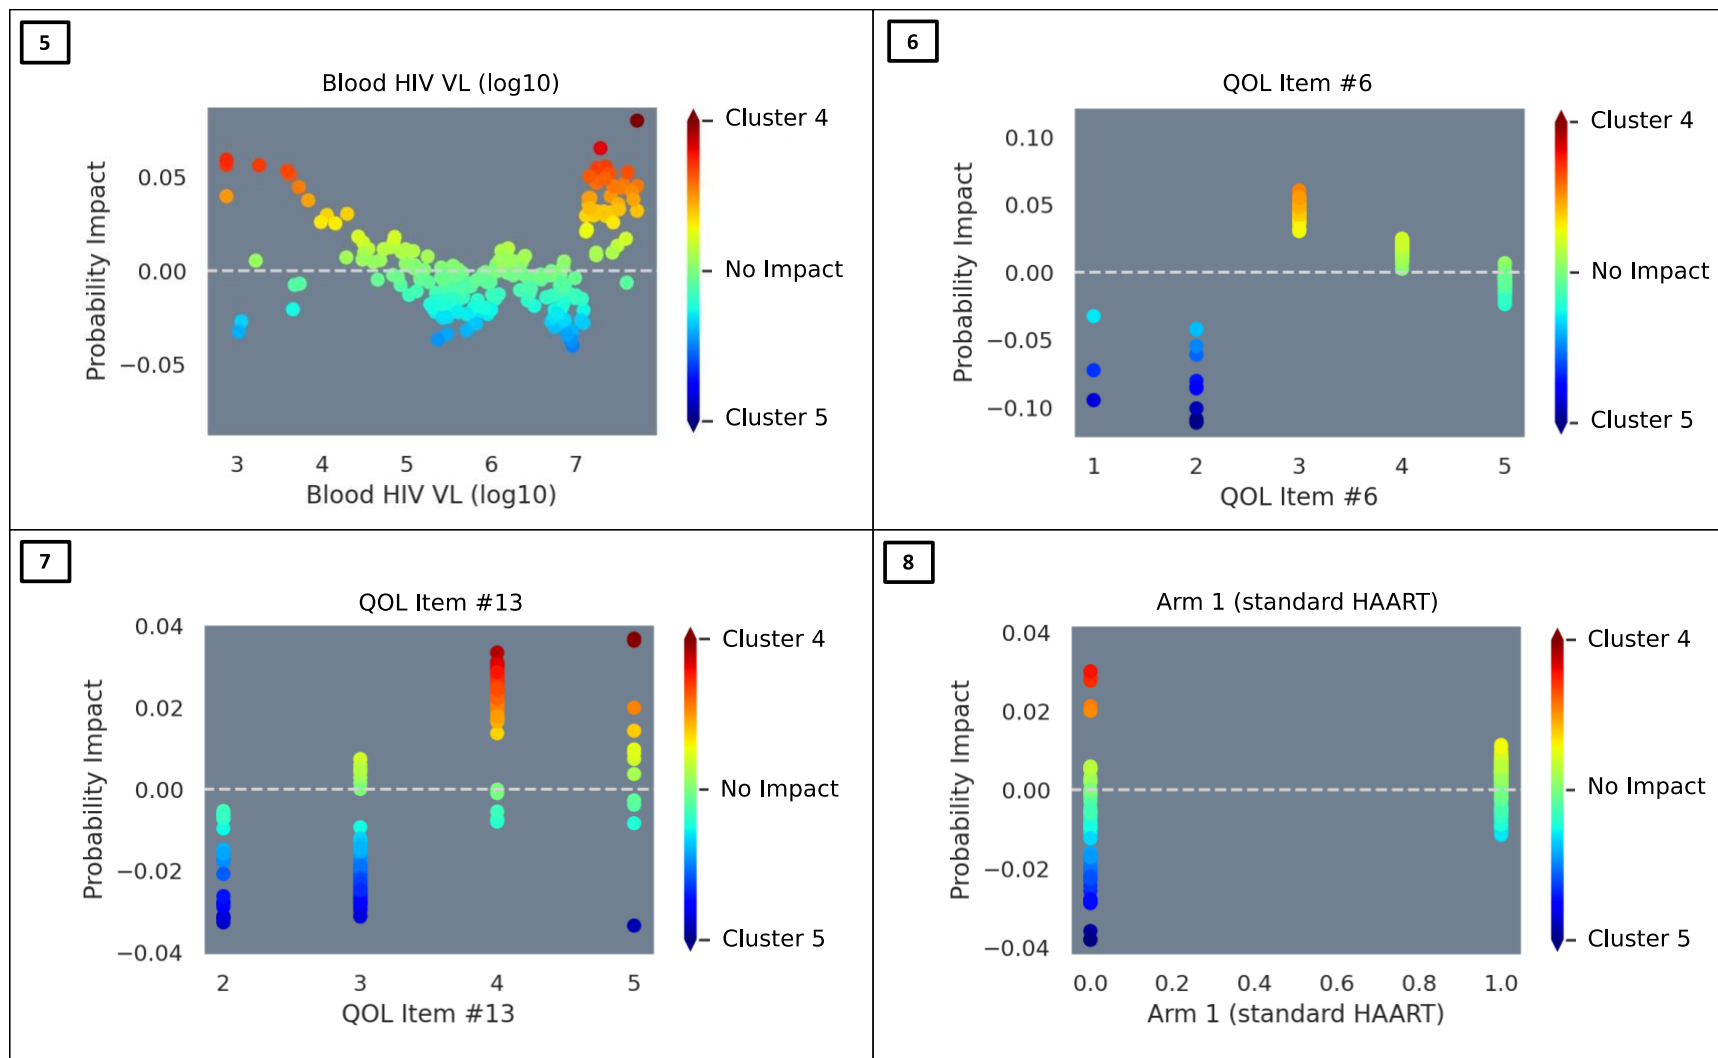

**SDC 2 cont.** Partial dependency plots depicting linear and nonlinear associations between predictors of CD4/CD8 T-cell ratio inversion due to slow CD4+ T-cell recovery (group 4) vs. high CD8+ T-cell count (group 5). Red color represents classification in the slow CD4+ T-cell recovery group. Blue color represents classification in the high CD8+ T-cell group.

**Supplemental Digital Content 2 (continued).** Partial dependency plots depicting the directionality of associations between risk features and classification in the trajectory group with slow CD4+ T-cell recovery vs. high CD8+ T-cell count.

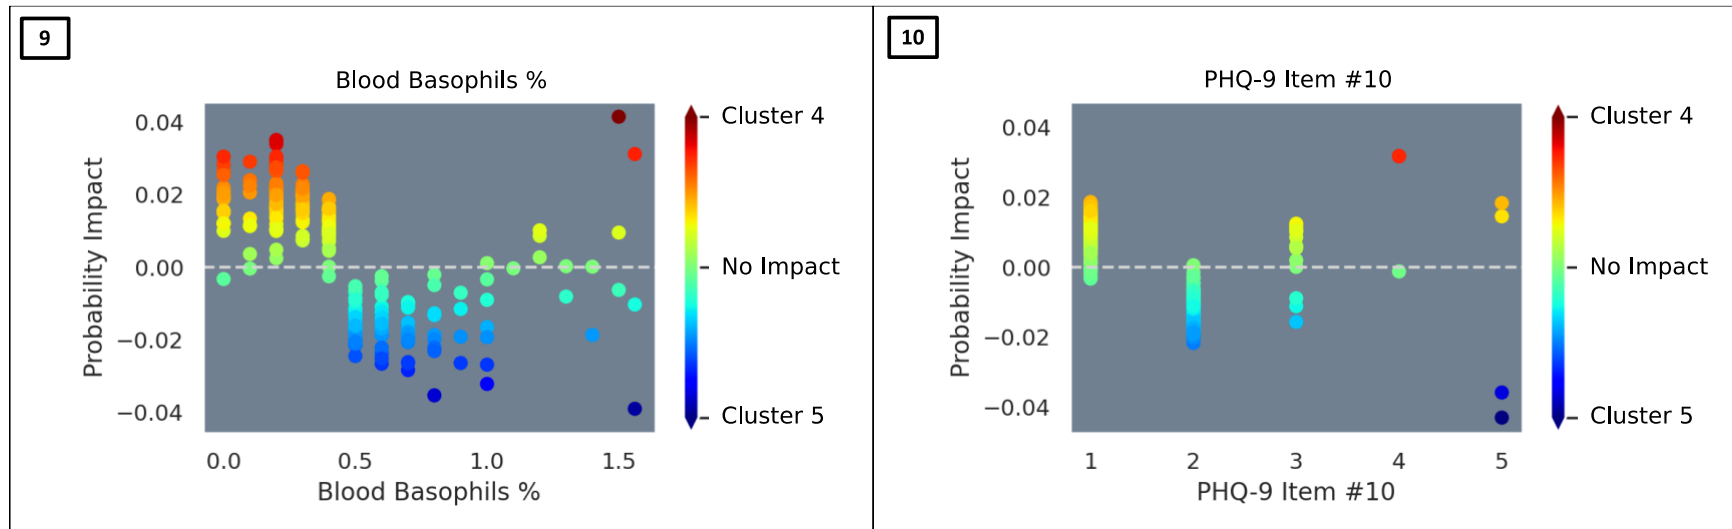

**SDC 2 cont.** Partial dependency plots depicting linear and nonlinear associations between predictors of CD4/CD8 T-cell ratio inversion due to slow CD4+ T-cell recovery (group 4) vs. high CD8+ T-cell count (group 5). Red color represents classification in the slow CD4+ T-cell recovery group. Blue color represents classification in the high CD8+ T-cell group.
